# Supplementary material for: Phylogenetic Evidence That Two Distinct Trichuris Genotypes Infect both Humans and Non-Human Primates
Source: PubMed Central journal article supplement (PMC3429462; doi:10.1371/journal.pone.0044187), 2012-08-28
Supplement: pone.0044187.s001.pdf [file pone.0044187.s001.pdf]

110 120 130 140 150 160 170 180 190  
 ....|....|....|....|....|....|....|....|....|....|....|....|....|....|....|....|....|....|....|....|....|....|

T. trichiura H. sapiens AM9929 GTTGTAGGCGCTGCTCCGCTGGCCTGCTAG-----CAGCAGCAGCAGCAGCAGCAGC  
 Trichuris sp. P. ursinus DGI G GTTGTAGGCGCTGCTCCGCTGGCCTGCTAG-----CAGCAGCAGCAGCAGCAGCAGC  
 Trichuris sp. P. ursinus DGII GTTGTAGGCGCTGCTCCGCTGGCCTGCTAG-----CAGCAGCAGCAGCAGC  
 Trichuris sp. P. ursinus DGIII GTTGTAGGCGCTGCTCCGCTGGCCTGCTAG-----CAGCAGCAGCAGC  
 DG-VNTRI

T. trichiura H. sapiens GQ3015 GCTG-----TCGCT-----GC  
 Trichuris sp. P. ursinus CP-GO GCTG-----TCGCT-----GC

T. trichiura N. gabriellae FM9 GTTG-----CCGCTG-CTGCTT-----GCGGC  
 T. trichiura C. guereza FM9919 GTTG-----CCGCTG-CTGCTT-----GCGGC

T. suis S. scrofa AM993016 Chi GTTG-----CCGCCG-CTGCTTG-----CAGCAGTAGCAGCAGCAGCAGC  
 T. suis S. scrofa AM993012 Chi GTTG-----CCGCCG-CTGCTTG-----CAGCAGTAGCAGCAGCAGC

T. ovis O. aries JF680987 Irel GGTGGACAGACGGCCCGTTCAGCGTGTTCGACATGGGCGCTGTTGCTGCGCGCAGCGCTGCTTTGCGGCAGAACCTTCCTCGGCAGCCTTTGCTTGCGAGC  
 T. discolor cattle AB367795 Ja GGTGGACAGACGACTCGGTTCAGCGTATTTGACGTGGGCGCTGTCGCTGCGCGTAGCGCTGCTTTGCGGCAGAACCTTCCTCGGCAGCCTGATGTTTGCGAGC  
 T. discolor C. crispus AB36779 GGTGGACAGACGACTCGGTTCAGCGTATTTGACGTGGGCGCTGTCGCTGCGCGTAGCGCTGCTTTGCGGCAGAACCTTCCTCGGCAGCCTGATGTTTGCGAGC

210 220 230 240 250 260 270 280 290  
 ....|....|....|....|....|....|....|....|....|....|....|....|....|....|....|....|....|....|....|....|....|....|

T. trichiura H. sapiens AM9929 AGCAGCAGGCGCTGGTGT-GGCGTTTGCTC-----GGTC  
 Trichuris sp. P. ursinus DGI G AGCAGCAGGCGCTGGTGT-GGCGTTTGCTC-----GGTC  
 Trichuris sp. P. ursinus DGII AGCAGCAGGCGCTGGTGT-GGCGTTTGCTC-----GGTC  
 Trichuris sp. P. ursinus DGIII AGCAGCAGGCGCTGGTGT-GGCGTTTGCTC-----GGTC

T. trichiura H. sapiens GQ3015 ATCATCGGGTGC TGGT--GACGCTCGTTGCTTCG G CAGTG TGGCGT--TC CAGTCGGCCG-----GTACTTTGGCT  
 Trichuris sp. P. ursinus CP-GO ATCATCGGGTGC TGGT--GACGCTCGTTGCTTCG CAGTG TGGCGT--TC CAGTCGGCCG-----GTACTTTGGCT

T. trichiura N. gabriellae FM9 GGCACAGGGTGCCGGT--GACGCCGTTTCTACGGC-----GGCG  
 T. trichiura C. guereza FM9919 GGCACAGGGTGCCGGT--GACGCTCGTTTCTACGGC-----GGCG

T. suis S. scrofa AM993016 Chi AGCGTCAGGTGCTGGTGACGACGCTCGTTCCGTCGGCATTGTGGCGTGTTCGCGAGTTGGCCGCC-----CCGTACTTTGGCG  
 T. suis S. scrofa AM993012 Chi AGCGTCAGGTGCTGGTGACGACGCTCGTTCCGTCGGCATTGTGGCGTGTTCGCGAGTTGGCCGCC-----CCGTACTTTGGCG

T. ovis O. aries JF680987 Irel AGCATGGGATGTCGACGACGACGACGGCGGCGGGCAGCGTTGGCTCTATGCGGTTGCGAGC-----GCTTGCTTCTTT  
 T. discolor cattle AB367795 Ja AGTATGGGACGTTGACGAGGACGGCGGGCGACGTTAGCTCCGTGTTGTTGCAAGCGCTAGTCGGCCAGCATCGGCCGTCGATAACTGAGCTTGCTTT  
 T. discolor C. crispus AB36779 AGTATGGGACGTTGACGAGGACGGCGGGCGACGTTAGCTCCGTGTTGTTGCAAGCGCTAGTCGGCCAGCATCGGCCGTCGATAACTGAGCTTGCTTT





```

          710      720      730      740      750      760      770      780      790
    ....|....|....|....|....|....|....|....|....|....|....|....|....|....|....|....|....|....|....|....|
T. trichiura H. sapiens AM9929 C--G-----TCGACGAGGTTCAAAGAACAGCCGTT---CGACCTCGAGC-ATCGAGG-----ACGGCTCGTCGCCGGTTGGAAAAAGAAA
Trichuris sp. P. ursinus DGI G C--G-----TCGACGAGGTTCAAAGAACAGCCGTT---CGACCTCGAGC-ATCGAGG-----ACGGCTCGTCGCCGGTTGGAAAAAGAAA
Trichuris sp. P. ursinus DGII  C--G-----TCGACGAGGTTCAAAGAACAGCCGTT---CGACCTCGAGC-ATCGAGG-----ACGGCTCGTCGCCGGTTGGAAAAAGAAA
Trichuris sp. P. ursinus DGIII C--G-----TCGACGAGGTTCAAAGAACAGCCGTT---CGACCTCGAGC-ATCGAGG-----ACGGCTCGTCGCCGGTTGGAAAAAGAAA

T. trichiura H. sapiens GQ3015 CTATG-----TCGGTGAGGTTTAAAGAACGGCCGTT---CG-CCTCGTGTGAGCGAATCGGGGAAGGACGGCTCGTCGCCGGTTGG-----
Trichuris sp. P. ursinus CP-GO CTATG-----TCGGTGAGGTTTAAAGAACGGCCGTT---CG-CCTCGTGTGAGCGAATCGGGGAAGGACGGCTCGTCGCCGGTTGG-----

T. trichiura N. gabriellae FM9 ACACG-----TCGGTGAGGTGTAAGGAACGGCCGTT---CG-CCACCTTGAGCGCACAAAGAAAGCAACGGCTCGTCGCCGGTTGG-----
T. trichiura C. guereza FM9919 ACACG-----TCGGTGAGGTGTAAGGAACGGCCGTT---CG-CCACCTTGAGCGCACAAAGAAAGCAACGGCTCGTCGCCGGTTGG-----

T. suis S. scrofa AM993016 Chi CTATG-----TCGGTGAGGTTTAAAGAACGGCCGTT---CGAACTCGAGCGCATCG-AGGAACGCGACGGCTCGTCGCCGGTTGG-----
T. suis S. scrofa AM993012 Chi CTATG-----TCGGTGAGGTTTAAAGAACGGCCGTT---CGAACTCGAGCGCATCG-AGGAACGCGACGGCTCGTCGCCGGTTGG-----

T. ovis O. aries JF680987 Irel CTGCGCGTATACGTTTCGTCGAGGTTCAAAGAACGACTGTCGTGGGCGCCACGCTTGGCGCATCCA---TTGACGGATCGTCGCCGTTTGG-----
T. discolor cattle AB367795 Ja CTGCGCGTATACGTTTCGTCGAGGTTCAAAGAACGACTGTCGAGAGTGCGAGGCTTGGCGCACCTT---TCGACGGTTCGTCGCCGTTCTGG-----
T. discolor C. crispus AB36779 CTGCGCGTATACGTTTCGTCGAGGTTCAAAGAACGACTGTCGAGAGTGCGAGGCTTGGCGCACCTT---TCGACGGTTCGTCGCCGTTCTGG-----

          810      820      830      840      850      860      870      880      890
    ....|....|....|....|....|....|....|....|....|....|....|....|....|....|....|....|....|....|....|....|
T. trichiura H. sapiens AM9929 AAGCAGCTTC-----ACCAGTGCACA-AGG---CGTCGTCCCTACTACGCACGCCGATGTGCCTTTCGACACGCAGACACTGCTGTCCGGCGCAATGA
Trichuris sp. P. ursinus DGI G AAGCAGCTTC-----ACCAGTGCACA-AGG---CGTCGTCCCTACTACGCACGCCGATGTGCCTTTCGACACGCAGACACTGCTGTCCGGCGCAATGA
Trichuris sp. P. ursinus DGII  AAGCAGCTTC-----ACCAGTGCACA-AGG---CGTCGTCCCTACTACGCACGCCGATGTGCCTTTCGACACGCAGACACTGCTGTCCGGCGCAATGA
Trichuris sp. P. ursinus DGIII AAGCAGCTTC-----ACCAGTGCACA-AGG---CGTCGTCCCTACTACGCACGCCGATGTGCCTTTCGACACGCAGACACTGCTGTCCGGCGCAATGA
                                                                SNPS

T. trichiura H. sapiens GQ3015 ---ATCTTC---TAAATGACCAATGCAGATAAG---CTGCGCTT-----CGCTGAAG-----CGTAGGAACGAATTGTTGAAAG---
Trichuris sp. P. ursinus CP-GO ---ATCTTC---TTCATGACCAATGCAGATAAG---CTGCGCTT-----CGCTGAAGCGA-----CGCAGGAACGAATTGTTGAAAGT---

T. trichiura N. gabriellae FM9 ---ATCTCCG---TTTACGACCAATGCAGATAAG---CTGCGCTT-----CGCTGAAG-----CGCAGGAACGAACTGTTGAGCGATGA
T. trichiura C. guereza FM9919 ---ATCTCCG---TTTACGACCAATGCAGATAAG---CTGCGCTT-----CGCTGAAG-----CGCAGGAACGAACTGTTGAGCGATGA

T. suis S. scrofa AM993016 Chi ---ATCTTCGTTATTAACGACCAATGCAGATAAG---CTGCGCTT-----CGTCGAAG-----TGCAGGAATC---TTGAAAC---
T. suis S. scrofa AM993012 Chi ---ATCTTCGTTATTAACGACCAATGCAGATAAG---CTGCGCTT-----CGTCGAAG-----TGCAGGAATC---TTGAAAC---

T. ovis O. aries JF680987 Irel -----ACCAGTACGCTTCGGTCCACTTCACACTA-----CGCAACAACAGCGTTGCTCTGTATGAATTGCAATTGGGAAAGCAA
T. discolor cattle AB367795 Ja -----ACCAGTACATTTTCGGTCCACTTCACTCTA-----CGCAACAACAGCGTTGCTCTGTACGAATTGCAACTGGGAAAGCAA
T. discolor C. crispus AB36779 -----ACCAGTACATTTTCGGTCCACTTCACTCTA-----CGCAACAACAGCGTTGCTCTGTACGAATTGCAACTGGGAAAGCAA

```





1310 1320 1330 1340 1350 1360 1370 1380 1390  
 ....|....|....|....|....|....|....|....|....|....|....|....|....|....|....|....|

T. trichiura H. sapiens AM9929 CGCACATTGCAGCGTCGATCAAAGATGTCGACGCTACGCCTGCTGAGGGTCGTTAAGCATAATAGCGAATGCGCCGCTCAG-----GCTACAG---GT  
 Trichuris sp. P. ursinus DGI G CGCACATTGCAGCGTCGATCAAAGATGTCGACGCTACGCCTGCTGAGGGTCGTTAAGCATAATAGCGAATGCGCCGCTCAG-----GCTACAG---GT  
 Trichuris sp. P. ursinus DGII CGCACATTGCAGCGTCGATCAAAGATGTCGACGCTACGCCTGCTGAGGGTCGTTAAGCATAATAGCGAATGCGCCGCTCAG-----GCTACAG---GT  
 Trichuris sp. P. ursinus DGIII CGCACATTGCAGCGTCGATCAAAGATGTCGACGCTACGCCTGCTGAGGGTCGTTAAGCATAATAGCGAATGCGCCGCTCAG-----GCTACAG---GT

T. trichiura H. sapiens GQ3015 CGCACATTGCAGCGTCGACGAACCATGTCGACGCTACGCCTGCTGAGGGTCGTTACGAAATAAAGCAAATGCGCCGCTCAGCAGGCTGCTACTGCCCTCT  
 Trichuris sp. P. ursinus CP-GO CGCACATTGCAGCGTCGACGAACCATGTCGACGCTACGCCTGCTGAGGGTCGTTACGAAATAAAGCAAATGCGCCGCTCAGCAGGCTGCTACTGCCCTCT

T. trichiura N. gabriellae FM9 CGCACATTGCAGCGTCGACGAACCATGTCGACGCTACGCCTGCTGAGGGTCGTTACGATGTAAAGCAAATGCGCCGCTCAG-----GTTCCGCCGT  
 T. trichiura C. guereza FM9919 CGCACATTGCAGCGTCGACGAACCATGTCGACGCTACGCCTGCTGAGGGTCGTTACGATGTAAAGCAAATGCGCCGCTCAG-----GTTCCGCCGT

T. suis S. scrofa AM993016 Chi CGCACATTGCAGCGTCGACGAACCATGTCGACGCTACGCCTGCTGAGGGTCGTTACGAAATAAAGCAAATGCGCCGCTCAG-----GTTCCGCCGT  
 T. suis S. scrofa AM993012 Chi CGCACATTGCAGCGTCGACGAACCATGTCGACGCTACGCCTGCTGAGGGTCGTTACGAAATAAAGCAAATGCGCCGCTCAG-----GTTCCGCCGT

T. ovis O. aries JF680987 Irel CGCACATTGCAGCGTCGATCAAACATGTCGGCGCTACGCCTGCTGAGGGTCGTTATCGAC--ACGCAATTG--CGCTCAGGCTGACGCCACCGTGGCT  
 T. discolor cattle AB367795 Ja CGCACATTGCAGCGTCGATCAAACATGTCGGCGCTACGCCTGCTGAGGGTCGTTACCGAC--ACGCAATTG--CGCTCAGGCTGACGCCACCGTGGCT  
 T. discolor C. crispus AB36779 CGCACATTGCAGCGTCGATCAAACATGTCGGCGCTACGCCTGCTGAGGGTCGTTACCGAC--ACGCAATTG--CGCTCAGGCTGACGCCACCGTGGCT

1410 1420 1430 1440 1450 1460 1470 1480 1490  
 ....|....|....|....|....|....|....|....|....|....|....|....|....|....|....|....|

T. trichiura H. sapiens AM9929 TGAG-----GTTGGTGGCGAGCA--CCGGACAAACCTGCATCCGCCG--G--CGAGC--GAGCGTGACGCCGAGCTCCGTTG  
 Trichuris sp. P. ursinus DGI G TGAG-----GTTGGTGGCGAGCA--CCGGACAAACCTGCATCCGCCG--G--CGAGC--GAGCGTGACGCCGAGCTCCGTTG  
 Trichuris sp. P. ursinus DGII TGAG-----GTTGGTGGCGAGCA--CCGGACAAACCTGCATCCGCCG--G--CGAGC--GAGCGTGACGCCGAGCTCCGTTG  
 Trichuris sp. P. ursinus DGIII TGAG-----GTTGGTGGCGAGCA--CCGGACAAACCTGCATCCGCCG--G--CGAGC--GAGCGTGACGCCGAGCTCCGTTG

T. trichiura H. sapiens GQ3015 GGGG-----ACTAGCGGTAGCAAGCAGCGCGGGTACGGCTGCCCCGTTGGTTGGTCTCAGC--GAGCGGACGCCGAGCTGCTCCCT  
 Trichuris sp. P. ursinus CP-GO TGGG-----GCTAGCGGTAGCAAGCAGCGCGGGTACGGCTGCCCCGTTGGGCGC--TGAGC--GAGCGGACGCCGAGC-----T

T. trichiura N. gabriellae FM9 TGGACATGCACGTGTCGGTCCCGCTAGCGGTAGCAAGCAGCGCGGACCGGGCTACTCCCGTGT--C--TGAGC--GAGCGGACGCCGAGGTCGTCCCT  
 T. trichiura C. guereza FM9919 TGGACATGCACGTGTCGGTCCCGCTAGCGGTAGCAAGCAGCGCGGACCGGGCTACTCCCGTGT--C--TGAGC--GAGCGGACGCCGAGGTCGTCCCT

T. suis S. scrofa AM993016 Chi TGGACTTGCACGGTCCGTGCAGCTAGCTGTAGCAAGCGGCGCGGATACGGCTACCCGAGGCT--G--TGAGC--GAGCGGACGCCGAGGTCCTCCT  
 T. suis S. scrofa AM993012 Chi TGGACTTGCACGGTCCGTGCAGCTAGCTGTAGCAAGCGGCGCGGATACGGCTACCCGAGGCT--G--TGAGC--GAGCGGACGCCGAGGTCCTCCT

T. ovis O. aries JF680987 Irel TAGG-----TACTTGAAGCTACGCG--TGGCGGCACGC-----TACGCCCTAAGCGCTACGCTGC-----T  
 T. discolor cattle AB367795 Ja TCGG-----TACAGGAAGCTGCGCG--TGGCGGCACGA-----TGCCTCTGAGCGTTACGCTGC-----T  
 T. discolor C. crispus AB36779 TCGG-----TACAGGAAGCTGCGCG--TGGCGGCACGA-----TGCCTCTGAGCGTTACGCTGC-----T



|                                | 1510                                       | 1520                                                | 1530                     | 1540                          | 1550                  | 1560       | 1570                                      | 1580  | 1590 |
|--------------------------------|--------------------------------------------|-----------------------------------------------------|--------------------------|-------------------------------|-----------------------|------------|-------------------------------------------|-------|------|
| T. trichiura H. sapiens AM9929 | CCAG                                       | CGAGCCG                                             | CGATGGCA                 | -----                         | ACTGGTAGGCGG          | AG         | CAGCGGAGAGCGGCCAAGTCAGCGTAGGGCGAAGACT     |       |      |
| Trichuris sp. P. ursinus DGI G | CCAG                                       | CGAGCCG                                             | CGATGGCA                 | -----                         | ACTGGTAGGCGG          | AG         | CAGCGGAGAGCGGCCAAGTCAGCGTAGGGCGAAGACT     |       |      |
| Trichuris sp. P. ursinus DGII  | CCAG                                       | CGAGCCG                                             | CGATGGCA                 | -----                         | ACTGGTAGGCGG          | AG         | CAGCGGAGAGCGGCCAAGTCAGCGTAGGGCGAAGACT     |       |      |
| Trichuris sp. P. ursinus DGIII | CCAG                                       | CGAGCCG                                             | CGATGGCA                 | -----                         | ACTGGTAGGCGG          | AG         | CAGCGGAGAGCGGCCAAGTCAGCGTAGGGCGAAGACT     |       |      |
|                                |                                            |                                                     |                          |                               |                       |            |                                           |       |      |
| T. trichiura H. sapiens GQ3015 | GCTG                                       | CTACTGGCAG                                          | CGACGGCAG                | GTGGCCGTCATCGCTGACAGGCAGCCG   |                       | AG         | CTTCTGCGGAGAGCGGGCTAACTCAGCGCAGTACGGAAGCT |       |      |
| Trichuris sp. P. ursinus CP-GO | GCTG                                       | CTTGGCAG                                            | CGACGGCAG                | GTGGCCGTCATCGCTGACAGGCAGCCG   |                       | AG         | CTGCGGAGAGCGGGCTAACTCAGCGCAGTACGGAAGCT    |       |      |
|                                |                                            |                                                     |                          |                               |                       |            |                                           |       |      |
| T. trichiura N. gabriellae FM9 | GCTG                                       | GCAG                                                | CGACGGCAG                | GTGTTTCGCTATCGCTGCCAGGCAGACGG |                       | AC         | CAGCGGAGAGCGGCTAACTCAGCGCAGCACGGAAGCT     |       |      |
| T. trichiura C. guereza FM9919 | GCTG                                       | GCAG                                                | CGACGGCAG                | GTGTTTCGCTATCGCTGCCAGGCAGACGG |                       | AC         | CAGCGGAGAGCGGCTAACTCAGCGCAGCACGGAAGCT     |       |      |
|                                |                                            |                                                     |                          |                               |                       |            |                                           |       |      |
| T. suis S. scrofa AM993016 Chi | GCTG                                       | CTAGCAG                                             | CGACGGCAG                | GTGCCCGTCATCGCTGGCAGGCAGCCGG  |                       | AG         | CTGCGGAGAGCGGCTAACTCAGCGCAGTACGGAAGCT     |       |      |
| T. suis S. scrofa AM993012 Chi | GCTG                                       | CTAGCAG                                             | CGACGGCAG                | GTGCCCGTCATCGCTGGCAGGCAGCCGG  |                       | AG         | CTGCGGAGAGCGGCTAACTCAGCGCAGTACGGAAGCT     |       |      |
|                                |                                            |                                                     |                          |                               |                       |            |                                           |       |      |
| T. ovis O. aries JF680987 Irel | GCTG                                       | ATGGCGGTCGAGTCCGCTGGGTCAGCCGAGCTGACCGGCAGCCGCTACTAG |                          |                               |                       |            | CAGCGGAGAGCAGTCCGGCTCGGCAGAGAACCTAGGCT    |       |      |
| T. discolor cattle AB367795 Ja | GCTG                                       | ATGGCGGTCGAGTCCGCTGGGCCAGCCGAGCTGGCCGGCAACCGCTACTAG |                          |                               |                       |            | CAGCAGAGAGCAGTCCGGCTCGGCAGAGAACCTAGGCC    |       |      |
| T. discolor C. crispus AB36779 | GCTG                                       | ATGGCGGTCGAGTCCGCTGGGCCAGCCGAGCTGGCCGGCAACCGCTACTAG |                          |                               |                       |            | CAGCAGAGAGCAGTCCGGCTCGGCAGAGAACCTAGGCC    |       |      |
|                                |                                            |                                                     |                          |                               |                       |            |                                           |       |      |
|                                | 1610                                       | 1620                                                | 1630                     | 1640                          | 1650                  | 1660       | 1670                                      | 1680  | 1690 |
| T. trichiura H. sapiens AM9929 | ACCCGACTTGGCTAC                            | CGGCCGCGCCGTCG                                      | GCGTACAGC                | -----                         | AGTTGAGCAGGGAGCGGTGAC |            | CGCACGCGCT                                | CGTAG |      |
| Trichuris sp. P. ursinus DGI G | ACCCGACTTGGCTAC                            | CGGCCGCGCCGTCG                                      | GCGTACAGC                | -----                         | AGTTGAGCAGGGAGCGGTGAC |            | CGCACGCGCT                                | CGTAG |      |
| Trichuris sp. P. ursinus DGII  | ACCCGACTTGGCTAC                            | CGGCCGCGCCGTCG                                      | GCGTACAGC                | -----                         | AGTTGAGCAGGGAGCGGTGAC |            | CGCACGCGCT                                | CGTAG |      |
| Trichuris sp. P. ursinus DGIII | ACCCGACTTGGCTAC                            | CGGCCGCGCCGTCG                                      | GCGTACAGC                | -----                         | AGTTGAGCAGGGAGCGGTGAC |            | CGCACGCGCT                                | CGTAG |      |
|                                |                                            |                                                     |                          |                               |                       |            |                                           |       |      |
| T. trichiura H. sapiens GQ3015 | GCCCGAGTTGGCTATGTCGCTACATCGTCA             | GCGTAAAGCCGGGAAACG                                  | ACCGTTGACCACCGAGCGACCAAC |                               | TGCGGGCGCGAG          |            | CGCAG                                     |       |      |
| Trichuris sp. P. ursinus CP-GO | GCCCGAGTTGGCTATGTCGCTACATCGTCA             | GCGTAAAGCCGGGAAACG                                  | ACCGTTGACCACCGAGCGACCAAC |                               | TGCGGGCGCGAG          |            | CGCAG                                     |       |      |
|                                |                                            |                                                     |                          |                               |                       |            |                                           |       |      |
| T. trichiura N. gabriellae FM9 | GCCCGAGTCGGCTACGTCGCCGCTCGTCG              | GC                                                  | GCGACCG                  | TCCGTTGACCACCGAGCGACCAT       |                       | CGCAATCGAG | CGCAG                                     |       |      |
| T. trichiura C. guereza FM9919 | GCCCGAGTCGGCTACGTCGCCGCTCGTCG              | GC                                                  | GCGACCG                  | TCCGTTGACCACCGAGCGACCAT       |                       | CGCAATCGAG | CGCAG                                     |       |      |
|                                |                                            |                                                     |                          |                               |                       |            |                                           |       |      |
| T. suis S. scrofa AM993016 Chi | GCCCGAGTTGGCTACGTCGCTACATCGTCGTCAGCGTACAGC | GCGACTGAGTTGTTTTACCCACCGAGCGACCAACCCGCGCGCGGAC      |                          |                               |                       | CGTAG      |                                           |       |      |
| T. suis S. scrofa AM993012 Chi | GCCCGAGTTGGCTACGTCGCTACATCGTCGTCAGCGTACAGC | GCGACTGAGTTGTTTTACCCACCGAGCGACCAACCCGCGCGCGGAC      |                          |                               |                       | CGTAG      |                                           |       |      |
|                                |                                            |                                                     |                          |                               |                       |            |                                           |       |      |
| T. ovis O. aries JF680987 Irel | TTCCGAGTCGGCTTTTACCCTCCTAATCG              | CGGC                                                |                          | GCAAGCGACCATCGAGAAACGGC       |                       | TGCAA      |                                           |       |      |
| T. discolor cattle AB367795 Ja | TTCCGAGTCGACTTTTCATGCTCGTAATCG             | CGGC                                                |                          | GCAAGCGACCATCGAGAAACGGC       |                       | TGCAA      |                                           |       |      |
| T. discolor C. crispus AB36779 | TTCCGAGTCGACTTTTCATGCTCGTAATCG             | CGGC                                                |                          | GCAAGCGACCATCGAGAAACGGC       |                       | TGCAA      |                                           |       |      |



|                                | 1910             | 1920               | 1930            | 1940             | 1950                  | 1960     |
|--------------------------------|------------------|--------------------|-----------------|------------------|-----------------------|----------|
|                                | ....             | ....               | ....            | ....             | ....                  | ....     |
| T. trichiura H. sapiens AM9929 | CGTCA            | ACTAGCGGTTGCGCCGCG | TGGCTC          | CACCCGTAC        | GTCCTCGATGTT          |          |
| Trichuris sp. P. ursinus DGI G | CGTCA            | ACTAGCGGTTGCGCCGCG | TGGCTC          | CACCCGTAC        | GTCCTCGATGTT          |          |
| Trichuris sp. P. ursinus DGII  | CGTCA            | ACTAGCGGTTGCGCCGCG | TGGCTC          | CACCCGTAC        | GTCCTCGATGTT          |          |
| Trichuris sp. P. ursinus DGIII | CGTCA            | ACTAGCGGTTGCGCCGCG | TGGCTC          | CACCCGTAC        | GTCCTCGATGTT          |          |
|                                |                  |                    |                 |                  |                       |          |
| T. trichiura H. sapiens GQ3015 | CGCTGGTCA        | GTCACGG            | CCGCAACG        | CCACTG           | CGCTCCGTTGTTGTCTCTTCG | TGTT     |
| Trichuris sp. P. ursinus CP-GO | CGCTGGTCA        | CCGTCGG            | CCGCTACG        | CCACTG           | CGCTCCGTTGTTGTCTCTTCG | TGTT     |
|                                |                  |                    |                 |                  |                       |          |
| T. trichiura N. gabriellae FM9 | CGCTGGTCACTCTCGG | CCGCCGCAAAGCGACTG  | CGCTCCCGTTCTTGT | TGTTTCG          | TGTT                  |          |
| T. trichiura C. guereza FM9919 | CGCTGGTCACTCTCGG | CCGCCGCAAAGCGACTG  | CGCTCCCGTTCTTGT | TGTTTCG          | TGTT                  |          |
|                                |                  |                    |                 |                  |                       |          |
| T. suis S. scrofa AM993016 Chi | CAGTGGTGA        | CTCTCGG            | CCGCCGCAA       | CAAGTG           | CGCTCCCGTTGTTGT       | TCG-TGTT |
| T. suis S. scrofa AM993012 Chi | CAGTGGTGA        | CTCTCAG            | CCGCCGCAA       | CGAGTG           | CGCTCCCGTTGTTGT       | TCG-TGTT |
|                                |                  |                    |                 |                  |                       |          |
| T. ovis O. aries JF680987 Irel | CGCTGGT          | -----              | CCGCCGAA        | CGAGTGGTCGTTCTGC | -----                 | TGTT     |
| T. discolor cattle AB367795 Ja | CGCTGGT          | -----              | CCGCAGAA        | CGAGTGGTCGTTCTGC | -----                 | TGTT     |
| T. discolor C. crispus AB36779 | CGCTGGT          | -----              | CCGCAGAA        | CGAGTGGTCGTTCTGC | -----                 | TGTT     |
